1 **Conversion of a defensive toxin-antitoxin system into an offensive T6SS**  
2 **effector in Burkholderia**

3 Sunil Kumar Yadav<sup>1</sup>, Ankita Magotra<sup>1</sup>, Aiswarya Krishnan<sup>1</sup>, Srayan Ghosh<sup>1</sup>, Rahul  
4 Kumar<sup>1</sup>, Joyati Das<sup>1</sup> and Gopaljee Jha<sup>1\*</sup>

5 \*: corresponding author

6 <sup>1</sup>Plant Microbe Interactions Laboratory,  
7 National Institute of Plant Genome Research,  
8 Aruna Asaf Ali Marg, New Delhi-110067, India  
9 Email: [jmsgopal@nipgr.ac.in](mailto:jmsgopal@nipgr.ac.in), [jmsgopal@gmail.com](mailto:jmsgopal@gmail.com)  
10 Tel: +91(0)1126735177  
11 Fax: +91(0)1126741658

12 **Abstract**

13 Bacteria use various kinds of toxins to either inhibit the growth of co-habiting bacteria  
14 or when needed control their own growth. Here we report that Burkholderia and  
15 certain other bacteria have altered the potential defensive function of Tox-REase-5  
16 domain containing toxins into offensive function. The *Burkholderia gladioli* strain  
17 NGJ1 encodes such toxins as type VI secretion system (T6SS) effectors (Tse) and  
18 potentially deploys them to kill co-habiting rice endophytic bacteria. Notably, the  
19 immunity (Tsi) proteins associated with Tse effectors demonstrate functional  
20 similarity with the antitoxin of type II toxin-antitoxin (TA) system. Genome analysis of  
21 diverse bacteria revealed that various Tse orthologs are either encoded as TA or  
22 T6SS effectors. In addition, potential evolutionary events associated with conversion  
23 of TA into T6SS effectors have been delineated. Our results indicate that the  
24 transposition of IS3 elements has led to the operonic fusion of certain T6SS related  
25 genes with TA genes resulting in their conversion into T6SS effectors. Such a  
26 genetic change has enabled bacteria to utilize novel toxins to precisely target co-  
27 habiting bacteria.

28

## 29 **Introduction**

30 Under natural conditions, bacteria have to compete with co-habiting bacteria for  
31 available resources. This can lead to severe evolutionary pressure on bacteria to  
32 adopt strategies to limit the growth of other cohabiting microbes<sup>1</sup>. Several bacterial  
33 species use a specialized protein secretion system called the type VI secretion  
34 system (T6SS) to target co-habiting bacteria<sup>2-6</sup>. The T6SS is a syringe like apparatus  
35 composed of a base plate, a membrane complex (spanning the inner and outer  
36 membrane) and an inner tube, being wrapped in a sheath-like structure<sup>7-10</sup>.  
37 Hexamers of the HCP (hemolysin-coregulated protein) protein forms the inner tube  
38 of the T6SS apparatus<sup>9,11</sup>. A trimer of the VgrG (Valine-glycine repeat protein G)  
39 protein forms a spike like structure on the top of the inner tube<sup>12</sup>. Further, the  
40 PAAR (proline-alanine-alanine-arginine) repeat-containing protein binds to the  
41 distal end of the spike and forms a sharp pointed tip<sup>13,14</sup>. Contraction of the sheath  
42 enables the HCP-VgrG-PAAR protein complex to puncture the bacterial  
43 membrane and deliver various T6SS effectors into the extracellular environment or  
44 directly into the target bacterial cells<sup>8,15,16</sup>. The effectors can be encoded either as  
45 fused protein with the HCP/VgrG/PAAR proteins as an additional domain or they  
46 are non-covalently fused to HCP/VgrG/PAAR protein that are encoded as  
47 upstream ORF in the effector operon<sup>12,15,17-20</sup>. Association with HCP/VgrG/PAAR  
48 proteins/domains is essential for translocation of effectors. Recent studies have  
49 suggested that certain chaperone (DUF4123, DUF1795 and DUF2169) and co-  
50 chaperones are also required for T6SS mediated delivery of effectors<sup>20-23</sup>. Till date,  
51 diverse kinds of proteins including phospholipases (Tli), amidases (Tae),  
52 glucosaminidase (Tge), nucleases (Rhs proteins), DNases (Tde), peptidases, pore-  
53 forming toxins etc. have been identified as T6SS effectors from different bacteria<sup>24-</sup>

54 <sup>26</sup>. These effectors demonstrate potent bactericidal activity by targeting the  
55 DNA/RNA/cell wall components of the prey bacterium<sup>23–25</sup>. However to protect self  
56 as well as sister cells from intoxication, bacteria have evolved cognate immunity  
57 proteins against each T6SS effector<sup>25,27,28</sup>. The effector-immunity pairs are encoded  
58 together in an operonic fashion and the immunity protein neutralizes toxic effect of  
59 the cognate effector via direct binding/interaction.

60 Beside T6SS effectors, bacteria encode various toxins as part of toxin-antitoxin (TA)  
61 system<sup>29–31</sup>. Similar to that of immunity proteins, the antitoxin of TA system bind to  
62 the cognate toxin and neutralize, to keep the cells protected. However, under certain  
63 environmental stress condition, the antitoxin gets degraded and thereby releases the  
64 toxin to exert antibacterial activity. This causes rapid growth arrest, formation of  
65 persistence and antibiotic resistant bacterial cells. However in certain kind of TA  
66 system (called type II TA system), besides directly neutralizing the toxin, the antitoxin  
67 alone or in complex with cognate toxin binds to the promoter of the TA operon and  
68 repress the expression of toxin-antitoxin genes<sup>29,31</sup>. The degradation of antitoxin,  
69 leads to release of toxin and also causes de-repression of toxin gene expression.  
70 Notably, the toxin and antitoxin ratio decides the fate of the cells.

71 In the present study, we demonstrate that a rice associated bacterium, *Burkholderia*  
72 *gladioli* strain NGJ1 utilizes two different T6SSs (here named as T6SS-1 and T6SS-  
73 2) to target a wide spectrum of co-habiting bacteria. Bioinformatics analysis indicates  
74 that the NGJ1 bacterium encodes fourteen different T6SS effectors and immunity  
75 proteins. Amongst them the restriction endonuclease (Tox-REase-5) domain  
76 containing effectors (here onward referred as Tse; type VI secreted effector) were  
77 quite noteworthy. The antitoxin (type VI secreted effector's immunity; Tsi) associated  
78 with these effectors showed transcriptional repression activity. Genome organization

79 and functional similarity suggest that the Tse effectors have potentially evolved from  
80 a bacterial TA system. The transposition of IS3 elements appears to have played a  
81 major role in this evolutionary adaptation which has enabled the bacteria to re-  
82 rationalize the function of these toxins as extracellular weapons to kill other bacteria.

### 83 **Results:**

#### 84 ***B. gladioli* strain NGJ1 uses two different type VI secretion systems (T6SS) for** 85 **antibacterial activity**

86 We observed that *B. gladioli* strain NGJ1 demonstrates strong antibacterial activity  
87 against several rice endophytic bacteria as well as *Escherichia coli* and  
88 *Agrobacterium tumefaciens* (Supplementary Fig. 1 and Supplementary Table 1).  
89 Genome analysis revealed NGJ1 to contain two different T6SS apparatus encoding  
90 gene clusters, here named as T6SS-1 (Burkholderia genome database locus id:  
91 *ACI79\_RS13910- ACI79\_RS13980*) and T6SS-2 (Burkholderia genome database  
92 locus id: *ACI79\_RS29585- ACI79\_RS29710*) (Fig. 1a). Through plasmid integration,  
93 we disrupted one important gene from each of the clusters to obtain  $\Delta$ T6SS-1 (*VipA*  
94 gene was disrupted) and  $\Delta$ T6SS-2 mutants (*ImpE*; gene was disrupted). The  
95 western blot analysis revealed that wild type NGJ1 is able to secrete HCP-1  
96 (associated with T6SS-1 cluster) and HCP-2 (Associated with T6SS-2 cluster)  
97 proteins into the extracellular milieu. This suggests that both of the T6SSs are  
98 functional. However,  $\Delta$ T6SS-1 and  $\Delta$ T6SS-2 mutants were defective in secreting  
99 their respective HCP proteins (Fig. 1b and c).

100 We further tested the antibacterial ability of  $\Delta$ T6SS-1 and  $\Delta$ T6SS-2 mutants. The  
101 disruption of either of T6SS-1 or T6SS-2 had compromised the antibacterial activity  
102 of NGJ1 on most of the tested bacteria (Supplementary Fig. 1 and Supplementary

103 Table 1). However in few cases,  $\Delta$ T6SS-1 had lost antibacterial activity but  $\Delta$ T6SS-2  
104 mutant remained proficient in killing them. This suggests that NGJ1 target these  
105 bacteria in a T6SS-1 dependent manner.

### 106 ***B. gladioli* strain NGJ1 harbors diverse antibacterial T6SS effectors**

107 Using computational analysis, we identified 14 different T6SS effector operons in the  
108 NGJ1 genome (Supplementary Fig. 2). Besides encoding effector proteins, each  
109 operon also encoded cognate immunity protein and certain carrier (VgrG and/or  
110 PAAR) as well as chaperone (DUF4123/ DUF1795) proteins which potentially assist  
111 in T6SS mediated delivery of effectors (Supplementary Fig. 2). The putative  
112 functions of various T6SS effectors of NGJ1 are summarized in Supplementary  
113 Table 2. Several effectors were chosen for ectopic expression and they were found  
114 to be lethal for the recombinant *E. coli* cells. In most of the cases, co-expression of  
115 cognate immunity proteins protected the cells from effector mediated killing  
116 (Supplementary Fig. 3). Interestingly, co-expression of Tse effectors (17tse/38tse)  
117 and their respective Tsi immunity (17tsi/38tsi) proteins using two different plasmids  
118 (pET23b:effector + pET28a:immunity) failed to protect the *E. coli* cells from effector  
119 mediated killing (Fig. 2a and b). However, when transcriptionally fused effector-  
120 immunity (17tsei/38tsei) proteins were expressed using a single plasmid, the  
121 recombinant *E. coli* cells were protected (Fig. 2c).

### 122 **The Tse effectors of NGJ1 have endonuclease activity**

123 NCBI Conserved Domain analysis revealed presence of a conserved restriction  
124 endonuclease-5 (Tox-REase-5) domain at the C-terminus of the Tse effectors  
125 (Supplementary Fig. 4a). This suggested that they might have endonuclease activity.  
126 Treatment with the crude preparation of Tse protein (17tse/38tse) caused

127 degradation of lambda DNA (Fig. 2d) as well as bacterial plasmid (Fig. 2e).  
128 Moreover, the plasmid isolated from effector (17tse/38tse) or effector and cognate  
129 immunity (17tse + 17tsi/ 38tse + 38tsi) expressing cells was potentially fragmented  
130 as only limited number of bacterial colonies was obtained when these plasmids were  
131 transformed into *E. coli* (Fig. 2f). On the other hand, the plasmid isolated from  
132 transcriptionally fused effector-immunity (17tsei/38tsei) expressing cells yielded a  
133 large number of colonies upon transformation in *E. coli*.

134 Next, we visualised the degradation of nucleic acid in recombinant *E. coli* cells using  
135 SYTOX Green dye. Lack of staining was observed in cells that express effector  
136 (17tse/38tse) or co-express effector and immunity proteins (17tse+17tsi/38tse  
137 +38tsi) on separate plasmids. However, intense staining was observed in cells that  
138 express transcriptionally fused effector-immunity pairs (17tsei/38tsei) (Fig. 2g and  
139 Supplementary Fig. 5). Taken together, these results indicate that Tse effectors can  
140 function as endonuclease.

#### 141 **The Tse effectors are potentially secreted through T6SS-2 of NGJ1**

142 The VgrG and PAAR proteins play important roles in secretion of T6SS effectors  
143 <sup>13,14,16,23</sup>. In NGJ1, we observed either VgrG or PAAR are encoded in the upstream  
144 region of various effector operons, indicating that they might act as a carrier for their  
145 T6SS mediated delivery (Fig. 3a and Supplementary Fig. 2). The VgrG and PAAR  
146 are known to be encoded in some but not all T6SS apparatus encoding gene  
147 clusters<sup>23,32,33</sup>. As shown in Fig 1a, the T6SS-2 gene cluster encodes a VgrG protein  
148 but lacks PAAR protein, while the T6SS-1 cluster lacks both VgrG and PAAR.  
149 Considering this, we hypothesized that effectors which have VgrG (VgrG<sup>effector</sup>)  
150 encoded in the same operon might be secreted through T6SS-1 while those which

151 are not co-encoded with VgrG would perforce have to be secreted through T6SS-2  
152 (Fig. 3a).

153 The Tse effector encoding operons of NGJ1 lacks VgrG but encode PAAR  
154 (PAAR<sup>Tse</sup>) as upstream ORF. Therefore they would employ the PAAR as a carrier for  
155 their T6SS mediated delivery. This was confirmed by yeast two hybrid assays which  
156 demonstrated interaction of the PAAR<sup>Tse</sup> with the cognate Tse proteins (Fig. 3b).  
157 Furthermore, the bacterial two hybrid assay revealed that the PAAR<sup>Tse</sup> has strong  
158 binding affinity with the VgrG of T6SS-2 apparatus (VgrG<sup>T6SS-2</sup>) but not with the VgrG  
159 of effector operons (VgrG<sup>9tle</sup>/ VgrG<sup>12tpe</sup>). This suggested that the Tse effectors are  
160 secreted through T6SS-2 via interaction of PAAR<sup>Tse</sup> with VgrG<sup>T6SS-2</sup>. In this regard,  
161 we observed that the VgrG<sup>T6SS-2</sup> has specific binding affinity with HCP-2, but not with  
162 the HCP-1 (Fig. 3c). On the other hand, VgrG<sup>9tle</sup> and VgrG<sup>12tpe</sup> demonstrated specific  
163 binding affinity with HCP-1 but not with HCP-2, suggesting them to be secreted  
164 through T6SS-1 (Fig. 3c).

### 165 **Antitoxins associated with the Tse proteins of NGJ1 demonstrate** 166 **transcriptional repressor activity**

167 Bioinformatics analysis revealed that the immunity proteins (Tsi) associated with the  
168 Tse effectors contains an Imm52 domain (Supplementary Fig. 4b). Phylogenetic  
169 analysis suggested them to function as bacterial LysR family transcriptional  
170 regulators (Supplementary Fig. 6). They also shared structural similarity with a CodY  
171 family of pleiotropic transcriptional repressor (Supplementary Table 3). Considering  
172 the above, we investigated the possible transcriptional repressor activity of 17tsi and  
173 38tsi immunity proteins in a yeast trans-repression assay<sup>34,35</sup>. When GAL4 was  
174 transcriptionally fused with 17tsi/ 38tsi, it caused repression of reporter gene (*lacZ*,  
175 *HIS3* and *ADE2*) expression in yeast. The recombinant cells showed auxotrophy to



176 histidine as well as adenine (Fig. 4a and b). On the other hand, GAL4  
177 transcriptionally fused with immunity protein (9tli) of lipase effector (which does not  
178 have transcription repression activity) induced the expression of reporter genes (Fig.  
179 4a and b).

180 We further analysed whether the immunity protein (17tsi/38tsi) can regulate its own  
181 promoter. For this, the expression of *β-glucuronidase* reporter gene under the  
182 promoter of Tse effector-immunity operon was analysed in presence or absence of  
183 immunity protein (17tsi/38tsi) as well as effector-immunity pair (17tsei/38tsei). The  
184 reporter assays revealed that presence of Tsi/Tsei proteins significantly reduce the  
185 expression of *β-glucuronidase* (Fig. 4c and d).

#### 186 **The Tse proteins are either encoded as T6SS effector or part of TA system in** 187 **different bacteria**

188 The Pfam database search revealed that homologs of the Tse and the Tsi proteins  
189 are conserved in diverse bacteria; predominantly being encoded together in an  
190 operon (Fig. 5 and Supplementary Fig. 7). As observed in the Tse effectors of NGJ1,  
191 presence of certain T6SS related proteins (PAAR, DUF4123 and hypothetical  
192 protein) was observed in the operons encoding Tse orthologs in certain Gamma-  
193 proteobacteria (class Morganellaceae and Pseudomonadaceae) and most of the  
194 Beta-proteobacteria (class Alcaligenaceae, Burkholderiaceae, Oxalobacteraceae)  
195 (Supplementary Fig. 7). This suggested that these Tse orthologs may serve as T6SS  
196 effectors. However, some closely related strains of these bacteria as well as several  
197 Actinobacteria and Delta-proteobacteria were found to encode the Tse and Tsi  
198 orthologs in the operon and did not carry the T6SS associated PAAR, DUF4123 and  
199 hypothetical protein (Fig. 5 and Supplementary Fig. 7). The lack of T6SS related

200 functions in the latter category of Tse and Tsi ortholog operons, suggested that they  
201 may not be secreted through T6SS and that they may be part of a toxin-antitoxin  
202 (TA) system. As indicated earlier, Tse proteins act as toxins and the Tsi proteins act  
203 as anti-toxins.

204 **The Tse proteins have potentially evolved as T6SS effectors from bacterial TA**  
205 **system.**

206 An examination of the genome of approximately 1800 strains of different  
207 *Burkholderia* sp. that are available in the Burkholderia genome database<sup>36</sup>, revealed  
208 intraspecific variation wherein some of them appear to have Tse orthologs as TA  
209 system while others appear to be T6SS effector (Supplementary Fig. 8). For  
210 example, the *B. pseudomallei* strain D7 3230-3018 harbours a Tse ortholog as a TA  
211 system while other *B. pseudomallei* strains encode the orthologs as a T6SS effector  
212 (at the same genomic locus) (Fig. 6a). The presence of many IS3 family  
213 transposases at the Tse locus suggested that they may have a role in generating this  
214 diversity. This was more apparent in *B. pseudomallei* strain 3000015237 wherein two  
215 IS3 elements carrying the T6SS related genes (PAAR, DUF4123 and Hypothetical  
216 protein) were present immediately upstream of TA genes (Fig. 6b). In another *B.*  
217 *pseudomallei* strain (NAU24B-3 and 2002721100); one of the two IS3 elements was  
218 absent. Moreover, in yet another *B. pseudomallei* strains (vgh16R and 2011756189),  
219 both the IS3 elements had been excised, leading to fusion of TA and T6SS related  
220 genes in a single operon (Fig. 6b). In *B. stagnalis* strains, the Tse orthologs are  
221 present as either a TA system or as a T6SS effector at the same genomic locus  
222 (Supplementary Fig. 9). This suggests that although we don't yet have strains with  
223 intermediate genomic features, similar events involving IS elements may have  
224 possibly led to conversion of a TA system to a T6SS system in the *B. stagnalis*.

225 Overall, our data supports that the Tse orthologs have evolved as T6SS effectors  
226 from ancestral TA system.

## 227 **Discussion**

228 The genus *Burkholderia* constitutes a large group of bacterial species, being present  
229 as soil dwellers or living in association with plants, animals, fungi (endosymbiont)  
230 and insects (as symbiont)<sup>37-39</sup>. Recently, we had demonstrated that the rice  
231 associated *Burkholderia gladioli* strain NGJ1 utilizes a type III secretion system  
232 (T3SS) to feed on fungi (phenomenon known as mycophagy)<sup>40</sup>. In this study, we  
233 report that the NGJ1 bacterium not only has antifungal activity, but it also has anti-  
234 bacterial activity and that it utilizes two different type VI secretion systems (T6SS-1  
235 and T6SS-2) to kill co-habiting bacteria.

236 The presence of a diverse arsenal of T6SS effectors highlights the potency of the  
237 antibacterial repertoire of NGJ1. To protect itself and sister cells from intoxication,  
238 the NGJ1 encodes an immunity protein that is specific for each of the effector  
239 proteins. This is evidence from the observation that co-expression of the immunity  
240 protein protects *E. coli* cells in which the cognate effector is ectopically expressed. A  
241 major exception was the observation that the Imm52 domain containing immunity  
242 (Tsi) proteins that are associated with Tox-REase5 domain (PF15648) containing  
243 effectors (Tse) failed to protect the cells (when co-expressed using two different  
244 plasmids). Notably when the effector and immunity proteins were expressed as  
245 transcriptionally fused proteins (Tsei), the cells survived. This suggests that the  
246 stoichiometric ratio of effector (Tse) and immunity (Tsi) proteins influences the  
247 effector neutralization ability of the immunity proteins. Additionally, the Tsi proteins  
248 possess a transcriptional repression activity, including ability to repress its own

249 promoter. This suggests that the Tsi immunity protein neutralizes the cognate  
250 effector not only through direct interaction, but also through repression of  
251 transcription of the effector gene. It is interesting that the anti-toxin of certain toxin-  
252 antitoxin (TA) systems has been shown to have repressor activity<sup>29,31</sup> and we note  
253 that the effector-immunity protein and the TA proteins are analogous to each other.

254 Recently, one of the Tox-REase-5 domain containing proteins (TseT) of  
255 *Pseudomonas aeruginosa* PAO1 has been shown to be a T6SS effector<sup>23</sup>. The *TseT*  
256 shares similar genomic organization to that of 17tse and 38tse of NGJ1, wherein  
257 certain T6SS related proteins (PAAR, DUF4123: a chaperone and Hypothetical  
258 protein: a co-chaperone) are encoded in the effector-immunity operon. These T6SS  
259 related proteins are shown to be required for T6SS mediated delivery of TseT in *P.*  
260 *aeruginosa* PAO1. It has been shown that the TseT effector interacts with the PAAR  
261 protein that is encoded as an upstream ORF in the same operon and that PAAR  
262 interacts with the VgrG of the T6SS apparatus<sup>23</sup>. In NGJ1, we observed a physical  
263 interaction of the Tse effector (17tse/ 38tse) protein with the PAAR protein that is  
264 encoded as upstream ORF in the same operon. Protein-protein interaction studies  
265 further suggested that the PAAR protein acts as a carrier of the Tse effectors and  
266 assists in their delivery by interacting with the VgrG of the T6SS-2 apparatus. This  
267 suggests that certain proteins such as PAAR, chaperone and co-chaperone that are  
268 encoded in the Tse-Tsi operon, are required for T6SS mediated delivery of Tse  
269 effector.

270 Bioinformatics analysis indicates that in Burkholderia and certain other bacteria, the  
271 Tse and Tsi orthologs are present in either one of two configurations. In one  
272 configuration they are encoded along with PAAR, chaperone and co-chaperone  
273 proteins, indicating that they may be part of T6SS effector-immunity pair. In the other

274 configuration, only Tse and Tsi are present and the accessory proteins (PAAR,  
275 chaperone and co-chaperone) are absent. We think that in the second configuration,  
276 the Tse-Tsi proteins are part of a toxin-antitoxin (TA) system as they are analogous  
277 to toxins and antitoxin proteins in many bacteria.

278 This reflects an interesting scenario, wherein the Tse orthologs function as TA  
279 systems in certain bacteria and as T6SS effectors in other bacteria. The presence of  
280 Tse orthologs as TA in some strains of certain *Burkholderia* sp. and as T6SS  
281 effectors in other strains of the same species (at the same genomic locus), suggests  
282 that the Tse proteins might have evolved as T6SS effectors from an ancestral TA  
283 system. The IS3 family transposons seems to have played an important role in  
284 conversion of TA into T6SS effectors, by integrating T6SS related proteins (PAAR,  
285 DUF4123 and co-chaperon) at the upstream regions of putative TA operons (as  
286 observed in case of *B. pseudomallei* strain 3000015237). With sequential excision of  
287 IS3 elements, the T6SS related genes have become operonic with TA genes,  
288 leading to conversion of Tse orthologs of a TA system into T6SS effectors.

289 The toxins of the TA system predominantly function intracellularly and contribute  
290 towards bacterial growth arrest/ persistence/ biofilm formation<sup>30,41,42</sup>. By converting  
291 an intracellular toxin into an extracellular weapon that can be secreted through the  
292 T6SS, certain *Burkholderia* strains have gained the ability to inhibit growth of co-  
293 habiting bacteria. In NGJ1 it is apparent that the T6SS helps the bacterium in  
294 inhibiting the growth of a number of bacteria that co-habit the same niche. By  
295 inhibiting the growth of these co-habiting bacteria, NGJ1 may be reducing  
296 competition for resources including that may be released upon degradation of fungal  
297 biomass.

298 Overall, our study indicates that the NGJ1 bacterium uses two different T6SSs to  
299 inhibit growth of co-habiting bacteria. One category of potential T6SS effectors that  
300 contain Tox-REase-5 domain are related to the type II TA system. Analysis of the  
301 genomes of several *Burkholderia* strains suggests an ancestral TA system has been  
302 converted into a T6SS effector by a series of genetic recombination events involving  
303 IS3 elements. Thus as ancestral function involved in growth arrest/persistence  
304 appears to have been converted into an offensive weapon to inhibit growth of  
305 potential bacterial competitors.

## 306 **Materials and methods**

### 307 **Growth conditions**

308 The bacterium *Burkholderia gladioli* strain NGJ1 (NGJ2; rif<sup>R</sup> derivative of NGJ1) and  
309 its derivative strains were grown on PDA (Potato Dextrose Agar; Himedia, India)  
310 plates at 28°C. *Escherichia coli* and its derivatives were grown on LBA (Luria  
311 Bertani Agar; Himedia, India) plates at 37°C. *Agrobacterium tumefaciens* strain  
312 EH101 was grown on PDA at 28°C. The *Saccharomyces cerevisiae* (yeast) strains  
313 were grown on YPD (Yeast Extract Peptone Dextrose; Himedia, India) at 28°C.  
314 Whenever required, the media was supplemented with antibiotics: Kanamycin,  
315 50µg/ml; Rifampicin, 20µg/ml; Ampicillin, 50µg/ml and Spectinomycin, 50µg/ml. The  
316 list of NGJ1, *E. coli* and *S. cerevisiae* strains and various plasmids used in this study  
317 are summarized in Supplementary Table 4.

### 318 **Antibacterial activity**

319 Various rice endophytic bacteria were isolated from field grown surface sterilized  
320 ~45-day old Pusa Basmati-1 (PB1) rice leaves. List of various endophytic bacteria  
321 used in this study and their growth conditions are summarized in Supplementary

322 Table 5. The pure cultures of each of these bacteria were established and 16s-  
323 ribosomal DNA sequencing was performed to identify them (primers are listed in  
324 Supplementary Table 6).

325 The antibacterial activity of NGJ1 and its different mutants was tested on solid  
326 laboratory media. 100 µl of overnight grown target bacteria were spread plated onto  
327 their respective growth medium (Supplementary Table 5) and 10 µl of overnight  
328 grown cultures of NGJ1 and its variants were spotted on the plate. The plates were  
329 incubated at ambient temperature (as per the target bacterium) and zone of inhibition  
330 was recorded 24h post incubation. The experiment was performed in triplicates and  
331 independently repeated three times. Similar results were observed in each biological  
332 and technical replicates.

### 333 **In-silico mining of T6SS apparatus and effector encoding gene clusters**

334 The draft genome sequence of *B. gladioli* strain NGJ1<sup>43</sup> was used for in-silico  
335 identification of putative T6SS apparatus encoding gene clusters using a web-based  
336 online tool; T346Hunter<sup>44</sup>. The presence of T6SS apparatus in the NGJ1 genome  
337 was further verified using Burkholderia Genome Database<sup>36</sup>. We carried out  
338 BLASTN analysis using T6SS apparatus components (such as HCP, VgrG and  
339 PAAR) and chaperone (DUF4123, DUF1795 and DUF2169) encoding genes of  
340 NGJ1 to predict T6SS effectors of NGJ1. The genomic organization of predicted  
341 T6SS effectors was analyzed using Burkholderia Genome Database and presence  
342 of cognate immunity proteins along with certain T6SS related proteins in each  
343 operon was noteworthy. The NCBI conserved domain database<sup>45</sup> and Pfam  
344 database<sup>46</sup> were used to identify conserved domain present in various T6SS effector

345 and immunity proteins of NGJ1. For structure homology, SWISS-MODEL; an online  
346 protein structure similarity prediction tool<sup>47</sup> was used.

### 347 **Construction of T6SS mutants**

348 Partial fragments (~300 bp) of one of the core T6SS apparatus genes of T6SS-1  
349 (*VipA*) and T6SS-2 (*ImpE*) were PCR amplified from the genomic DNA of *B. gladioli*  
350 strain NGJ1 using gene specific primers (Supplementary Table 6) and cloned into  
351 pK18 mob vector. The recombinant plasmid was electroporated (Gene pulsar  
352 XcellTm; BioRad) into *B. gladioli* strain NGJ1, as per the method described in<sup>40</sup>. The  
353 insertion mutants were selected on kanamycin and rifampicin containing KBA (King's  
354 medium B Base; Himedia, India) plates. The  $\Delta$ T6SS-1 and  $\Delta$ T6SS-2 mutant NGJ1  
355 strains were confirmed by PCR using gene specific flanking forward and vector  
356 specific reverse (M13) primers (Supplementary Table 6).

### 357 **Western blot analysis**

358 The cell free supernatant was collected from 100ml of overnight grown NGJ1 culture  
359 and precipitated using TCA (12% wt/vol). The precipitated pellet was dissolved in 2  
360 ml PBS (10mM) and used as crude supernatant protein. Further to isolate total  
361 protein, the bacterial pellet (obtained from 10 ml culture) was crushed in liquid N<sub>2</sub>  
362 and the powder was dissolved in 2 ml of buffer (10 mM PBS: phosphate buffer saline;  
363 pH 7.4, 1 mM lysozyme, and 1 mM PMSF: Phenylmethanesulfonyl fluoride). Upon  
364 centrifugation, the soluble fraction was used as protein extract.

365 10  $\mu$ g of protein samples were resolved on SDS-PAGE gel (12%) and electro blotted  
366 onto PVDF membrane, as described in<sup>40</sup>. The membrane was individually probed  
367 with HCP-1 (T6SS-1) and HCP-2 (T6SS-2) specific polyclonal peptide antibodies



368 (primary antibody raised in rabbit) at 1:25,000 dilutions. The alkaline phosphatase  
369 conjugated anti-rabbit IgG (Sigma) was used as secondary antibody (1:10,000  
370 dilutions) and the blot was developed as per manufacturer's instruction (Sigma).

### 371 **Effector-immunity functionality assay**

372 The full-length coding sequences of selected effector and immunity genes were PCR  
373 amplified from NGJ1 genomic DNA using gene specific primers (Supplementary  
374 Table 6). The effector encoding genes were cloned in pET23b (pET23b: effector)  
375 and the cognate immunity encoding genes were cloned in pET28a (pET28a:  
376 immunity). *E. coli* BL21 (DE3) cells were transformed with the pET23b: effector or  
377 co-transformed with the cognate pET28a: immunity plasmid. The positive  
378 transformed bacterial cells were selected by colony PCR using gene specific primer  
379 (Supplementary Table 6).

380 In order to test the toxicity of T6SS effectors, the recombinant *E. coli* cells were  
381 grown in 10 ml liquid media to mid log phase (O.D<sub>600</sub> ~ 0.5) and the protein  
382 expression was induced using 1mM IPTG (Isopropyl β- d-1-thiogalactopyranoside;  
383 Sigma-Aldrich, USA) for 3h at 37°C. In control (-IPTG), an equivalent amount of  
384 sterile distilled H<sub>2</sub>O was added instead of IPTG. Subsequently, the recombinant *E.*  
385 *coli* cells were serially diluted and spotted on antibiotic containing LBA plates to  
386 monitor their growth. Similarly, the survival of *E. coli* cells that co-express effector  
387 and cognate immunity proteins were also analyzed.

388 Further the complete coding sequences of 17tse and 38tse effector along with their  
389 cognate immunity genes were PCR amplified from NGJ1 genomic DNA using  
390 effector specific forward and immunity specific reverse primers (Supplementary  
391 Table 6). The PCR product was cloned into pET28a to obtain pET28a:17tsei/

392 pET28a:38tsei constructs and they were transformed into BL21 cells to express  
393 transcriptionally fused effector-immunity (17tsei/ 38tsei) proteins. Positive  
394 transformants were selected by colony PCR. Upon 3h of IPTG induction, the survival  
395 rate of the recombinant bacteria was analyzed as described above.

### 396 **Nuclease assay**

397 For protein isolation, 10 ml cultures of recombinant *E. coli* cells (BL21) were grown to  
398 mid log phase ( $O.D_{600} \sim 0.5$ ) and subsequently 1mM IPTG was added followed by  
399 incubation at 37°C for 3h. The bacterial pellet obtained upon centrifugation was  
400 sonicated in 1 ml buffer (10 mM PBS; pH 7.4, 1 mg/ml lysozyme and 1 mM PMSF).  
401 The soluble fraction was then collected and used as crude protein. Similarly, the  
402 crude protein was also isolated from non-recombinant BL21 cells as control to rule  
403 out the activity of other proteins present in the crude preparation.

404 1  $\mu$ g of lambda DNA (Thermo Scientific™) and 0.5  $\mu$ g of pET23b plasmids  
405 (linearized with *EcoRI* digestion) were treated with the 10  $\mu$ l of different crude protein  
406 preparations for 30 min at 28°C. The buffer treated lambda DNA and linearized  
407 pET23b plasmid were used as control. The treated samples were resolved on 0.8%  
408 agarose gel and visualized under UV Tran-illuminator (ChemiDoc MP System, Bio-  
409 Rad).

410 The plasmid from various recombinant *E. coli* cells (10 ml culture) upon 3h of 1mM  
411 IPTG induction was extracted using geneJET plasmid isolation Kit (Thermo  
412 scientific). 100ng of isolated plasmids were transformed into chemical competent *E.*  
413 *coli* strain DH5 $\alpha$  using heat-shock treatment. The positive transformants obtained on  
414 appropriate antibiotic containing LBA plates were counted.

415 Each experiment was independently repeated three times and similar results were  
416 obtained.

#### 417 **Sytox Green staining and microscopic analysis**

418 To visualize nucleic acid degradation under in-vivo condition, 10 ml of recombinant  
419 *E. coli* (BL21) cells were grown in LB media containing appropriate antibiotics. Upon  
420 3h of 1 mM IPTG induction, 2 ml of culture was pelleted down and washed thrice  
421 with 50 mM Tris buffer (pH-7.0). Cells were heat-treated for 2 min at 90<sup>0</sup>C to make  
422 them permeable for uptake of the stain. The cells were stained with SYTOX™ Green  
423 Nucleic Acid Stain dye (0.2 $\mu$ M; Invitrogen, Catalog number: S7020) for 10 min in  
424 dark at 37<sup>0</sup>C. To visualize the nucleic acid, cells were washed twice with Tris buffer  
425 and analyzed by fluorescence microscope (AOBS TCS-SP5; LEICA, GERMANY)  
426 under GFP filter (495 nm). The experiment was independently repeated three times,  
427 each with a minimum of three technical repeats and similar results were obtained.

#### 428 **Bacterial two-hybrid analysis**

429 In order to understand the potential T6SS-1/T6SS-2 mediated secretion of Tse  
430 effectors, bacterial two-hybrid analysis was performed following established  
431 protocol<sup>48</sup>. Genes encoding the proteins of interest (X and Y) were PCR amplified  
432 from the NGJ1 genomic DNA using appropriate primers (Supplementary Table 6)  
433 and cloned into pKNT25 and pUT18C vectors, respectively. The recombinant  
434 plasmids encoding the T25-X and T18-Y hybrid proteins were transformed into the  
435 competent BTH101 reporter cells. The interaction was visually monitored by  
436 appearance of blue color due to activity of  $\beta$ -galactosidase on X-gal (20 mg/ml; 5-  
437 bromo-4-chloro-3-indolyl- $\beta$ -D-galactopyranoside). Further, color formation was  
438 quantified spectrophotometrically by monitoring the absorbance at wavelength

439 450nm. The bacterial cells transformed with plasmids pKT25-zip and pUT18C-zip  
440 served as positive controls and those with pKNT25 and pUT18C served as negative  
441 controls.

#### 442 **Yeast two hybrid analysis**

443 Yeast two hybrid (Y2H) assay was performed using Matchmaker Gold Yeast Two-  
444 Hybrid library screening system (Clontech, USA). The full-length copy of genes of  
445 PAAR and Tse effector were PCR amplified from the NGJ1 genomic DNA using  
446 gene specific primer pairs (Supplementary Table 6) and cloned into pGBKT7 and  
447 pGADT7 vectors, respectively. Both the recombinant plasmids were co-transformed  
448 into Y2H Gold strain of yeast, following the manufacturer's instructions. Positive  
449 transformants were selected on synthetically defined media lacking leucine and  
450 tryptophan amino acids ( $SD^{-Leu-Trp}$ ; double dropout). The interaction assay was  
451 performed by growing positive transformed colonies on synthetically defined media  
452 lacking leucine, tryptophan, histidine and adenine ( $SD^{-Leu-Trp-His-Ade}$ ; quadruple  
453 dropout) but supplemented with 30mM concentration of 3AT (3-Amino-1, 2, 4-  
454 triazole) at 30<sup>0</sup> C. The yeast cells co-transformed with pGBKT7-53 and pGADT7-T  
455 were used as positive control while the cells co-transformed with pGBKT7 and  
456 pGADT7 (empty vectors) were used as negative control.

#### 457 **Trans-repression assay**

458 For trans-repression assay, the full-length coding sequence of genes of interest was  
459 PCR amplified from NGJ1 genomic DNA using gene specific primers  
460 (Supplementary Table 6). They were cloned in pGBKT7 vector (having both BD and  
461 AD domain) in frame with GAL4 transcription factor and transformed into *S.*  
462 *cerevisiae* (yeast) strain AH109 (harboring GAL4 regulated reporter genes lacZ;  $\beta$ -

463 galactosidase, HIS3; imidazole glycerol phosphate dehydratase, and ADE2;  
464 Phosphoribosyl aminoimidazole carboxylase) as described<sup>35</sup> using EZ-Yeast™  
465 Transformation Kit (MP Biomedicals). Positive colonies were selected through colony  
466 PCR using gene specific primers (Table 6) and the activity of reporter genes was  
467 tested by their differential growth on SD<sup>-Trp-His-Ade</sup> (Triple dropout) media with 20 mM  
468 3AT (3-amino-1, 2, 4-triazole). Further LacZ ( $\beta$ -galactosidase enzyme) expression  
469 was quantified spectrophotometrically ( $\lambda=450\text{nm}$ ) using X-GAL as substrate.

#### 470 **Auto trans-repression assay**

471 The promoter region (500bp) of Tse effector operons (17tse and 38tse) was PCR  
472 amplified (Supplementary Table 6) and cloned into pBI101.1 expression vector in a  
473 manner that it can drive *GUS* ( $\beta$ -glucuronidase) expression. Recombinant pBI101.1  
474 was transformed into *E. coli* BL21 (DE3) cells alone or along with pET28a: immunity  
475 (17tsi/38tsi/9tli) or pET28a: effector-immunity (17tsei/38tsei). Auto transcriptional  
476 repression activity was tested by visualizing the expression of  *$\beta$ -glucuronidase* gene  
477 using 5-bromo-4-chloro-3-indolyl glucuronide (X-Gluc) as substrate. Further, the  $\beta$ -  
478 glucuronidase enzyme activity was spectrophotometrically quantified by using a  
479 fluorescent substrate; 4-methylumbelliferyl  $\beta$ -D-glucuronide (4-MUG)<sup>49</sup>.

#### 480 **Phylogenetic analysis**

481 The homologous amino acid sequences of Tse effectors and Tsi immunity proteins  
482 of NGJ1 were downloaded from Pfam<sup>46</sup> and NCBI database<sup>50</sup>. After removal of  
483 duplicate sequences from the same strain, the Tse and Tsi homologous sequences  
484 were separately aligned using ClustalW algorithm. The aligned sequences were  
485 subjected to phylogenetic analysis using MEGAX following Neighbor-joining  
486 algorithm with 500 bootstrap values<sup>51</sup>.

487 **Evolutionary analysis**

488 The genomic organization of Tse and Tsi orthologs were studied in different  
489 *Burkholderia* sp. using Burkholderia Genome Database<sup>36</sup>. In most of the strains  
490 these proteins were found to be encoded along with certain T6SS related proteins  
491 (PAAR, DUF4123: a chaperon and a hypothetical protein) and we considered them  
492 as candidate T6SS effectors. However, in some strains, only Tse and Tsi orthologs  
493 were encoded in the operon and the T6SS related proteins were absent. These  
494 orthologs were considered as part of Toxin-antitoxin (TA) system. Further the  
495 presence of IS3 family transposases were detected at these loci. The conservation  
496 of flanking genes was analyzed using NCBI blast analysis<sup>50</sup> and Burkholderia  
497 Genome Database<sup>36</sup>.

498 **Statistical analysis**

499 One-way analysis of variance was performed using Sigma Plot 12.0 (SPSS, Inc.  
500 Chicago, IL, USA) with  $P \leq 0.001$  and  $P \leq 0.05$  considered statistically significant. The  
501 statistical significance is mentioned in the figure legend, wherever required.

502

503 **References**

- 504 1. Hibbing, M. E., Fuqua, C., Parsek, M. R. & Peterson, S. B. Bacterial  
505 competition: Surviving and thriving in the microbial jungle. *Nature Reviews*  
506 *Microbiology* **8**, 15–25 (2010).
- 507 2. Ho, B. T., Dong, T. G. & Mekalanos, J. J. A view to a kill: The bacterial type VI  
508 secretion system. *Cell Host and Microbe* **15**, 9–21 (2014).
- 509 3. Sana, T. G., Lugo, K. A. & Monack, D. M. T6SS: The bacterial ‘fight club’ in the  
510 host gut. *PLoS Pathogens* **13**, e1006325 (2017).
- 511 4. Chassaing, B. & Cascales, E. Antibacterial Weapons: Targeted Destruction in  
512 the Microbiota. *Trends in Microbiology* **26**, 329–338 (2018).
- 513 5. Anderson, M. C., Vonaesch, P., Saffarian, A., Marteyn, B. S. & Sansonetti, P.  
514 J. *Shigella sonnei* Encodes a Functional T6SS Used for Interbacterial  
515 Competition and Niche Occupancy. *Cell Host Microbe* **21**, 769-776.e3 (2017).
- 516 6. Bernal, P., Llamas, M. A. & Filloux, A. Type VI secretion systems in plant-  
517 associated bacteria. *Environmental Microbiology* **20**, 1–15 (2018).
- 518 7. Park, Y. J. *et al.* Structure of the type VI secretion system TssK–TssF–TssG  
519 baseplate subcomplex revealed by cryo-electron microscopy. *Nat. Commun.* **9**,  
520 5385 (2018).
- 521 8. Silverman, J. M., Brunet, Y. R., Cascales, E. & Mougous, J. D. Structure and  
522 Regulation of the Type VI Secretion System. *Annu. Rev. Microbiol.* **66**, 453–  
523 472 (2012).
- 524 9. Wang, J. *et al.* Cryo-EM structure of the extended type VI secretion system  
525 sheath-tube complex. *Nat. Microbiol.* **2**, 1507–1512 (2017).
- 526 10. Cherrak, Y. *et al.* Biogenesis and structure of a type VI secretion baseplate.  
527 *Nat. Microbiol.* **3**, 1404–1416 (2018).
- 528 11. Ruiz, F. M. *et al.* Crystal structure of hcp from acinetobacter baumannii: A  
529 component of the type VI secretion system. *PLoS One* **10**, e0129691 (2015).
- 530 12. Bondage, D. D., Lin, J. S., Ma, L. S., Kuo, C. H. & Lai, E. M. VgrG C terminus  
531 confers the type VI effector transport specificity and is required for binding with  
532 PAAR and adaptor-effector complex. *Proc. Natl. Acad. Sci. U. S. A.* **113**,  
533 E3931–E3940 (2016).
- 534 13. Shneider, M. M. *et al.* PAAR-repeat proteins sharpen and diversify the type VI  
535 secretion system spike. *Nature* **500**, 350–353 (2013).
- 536 14. Wood, T. E., Howard, S. A., Wettstadt, S. & Filloux, A. PAAR proteins act as  
537 the ‘sorting hat’ of the type VI secretion system. *Microbiology* **165**, 1-16 (2019).
- 538 15. Cianfanelli, F. R., Monlezun, L. & Coulthurst, S. J. Aim, Load, Fire: The Type  
539 VI Secretion System, a Bacterial Nanoweapon. *Trends in Microbiology* **24**, 51–  
540 62 (2016).

- 541 16. Cianfanelli, F. R. *et al.* VgrG and PAAR Proteins Define Distinct Versions of a  
542 Functional Type VI Secretion System. *PLoS Pathog.* **12**, e1005735 (2016).
- 543 17. Whitney, J. C. *et al.* Genetically distinct pathways guide effector export through  
544 the type VI secretion system. *Mol. Microbiol.* **92**, 529–542 (2014).
- 545 18. Hachani, A., Allsopp, L. P., Oduko, Y. & Filloux, A. The VgrG proteins are ‘à la  
546 carte’ delivery systems for bacterial type VI effectors. *J. Biol. Chem.* **289**,  
547 17872–17884 (2014).
- 548 19. Silverman, J. M. *et al.* Haemolysin Coregulated Protein Is an Exported  
549 Receptor and Chaperone of Type VI Secretion Substrates. *Mol. Cell* **51**, 584–  
550 593 (2013).
- 551 20. Lien, Y.-W. & Lai, E.-M. Type VI Secretion Effectors: Methodologies and  
552 Biology. *Front. Cell. Infect. Microbiol.* **7**, 254 (2017).
- 553 21. Unterweger, D. *et al.* Chimeric adaptor proteins translocate diverse type VI  
554 secretion system effectors in *Vibrio cholerae*. *EMBO J.* **34**, 2198–2210 (2015).
- 555 22. Liang, X. *et al.* Identification of divergent type VI secretion effectors using a  
556 conserved chaperone domain. *Proc. Natl. Acad. Sci.* **112**, 9106–9111 (2015).
- 557 23. Burkinshaw, B. J. *et al.* A type VI secretion system effector delivery  
558 mechanism dependent on PAAR and a chaperone-co-chaperone complex.  
559 *Nat. Microbiol.* **3**, 632–640 (2018).
- 560 24. Russell, A. B., Peterson, S. B. & Mougous, J. D. Type VI secretion system  
561 effectors: Poisons with a purpose. *Nature Reviews Microbiology* **12**, 137–148  
562 (2014).
- 563 25. Russell, A. B. *et al.* Type VI secretion delivers bacteriolytic effectors to target  
564 cells. *Nature* **475**, 343–349 (2011).
- 565 26. Russell, A. B. *et al.* Diverse type VI secretion phospholipases are functionally  
566 plastic antibacterial effectors. *Nature* **496**, 508–512 (2013).
- 567 27. Yang, X., Long, M. & Shen, X. Effector–immunity pairs provide the T6SS  
568 nanomachine its offensive and defensive capabilities. *Molecules* **23**, 1009  
569 (2018).
- 570 28. Benz, J. & Meinhart, A. Antibacterial effector/immunity systems: It’s just the tip  
571 of the iceberg. *Curr. Opin. Microbiol.* **17**, 1–10 (2014).
- 572 29. Harms, A., Brodersen, D. E., Mitarai, N. & Gerdes, K. Toxins, Targets, and  
573 Triggers: An Overview of Toxin-Antitoxin Biology. *Molecular Cell* **70**, 768–784  
574 (2018).
- 575 30. Page, R. & Peti, W. Toxin-antitoxin systems in bacterial growth arrest and  
576 persistence. *Nat. Chem. Biol.* **12**, 208–214 (2016).
- 577 31. Unterholzner, S. J., Poppenberger, B. & Rozhon, W. Toxin-antitoxin systems:  
578 Biology, identification, and application. *Mob. Genet. Elements* **3**, e26219  
579 (2013).



- 580 32. Barret, M., Egan, F., Fargier, E., Morrissey, J. P. & O'Gara, F. Genomic  
581 analysis of the type VI secretion systems in *Pseudomonas* spp.: Novel clusters  
582 and putative effectors uncovered. *Microbiology* **157**, 1726-1739 (2011).
- 583 33. Alcoforado Diniz, J., Liu, Y. C. & Coulthurst, S. J. Molecular weaponry: Diverse  
584 effectors delivered by the Type VI secretion system. *Cellular Microbiology* **17**,  
585 1742-1751 (2015).
- 586 34. Ohta, M., Matsui, K., Hiratsu, K., Shinshi, H. & Ohme-Takagi, M. Repression  
587 domains of class II ERF transcriptional repressors share an essential motif for  
588 active repression. *Plant Cell* **13**, 1959-1968 (2001).
- 589 35. Mathew, I. E., Das, S., Mahto, A. & Agarwal, P. Three rice NAC transcription  
590 factors heteromerize and are associated with seed size. *Front. Plant Sci.* **7**,  
591 1638 (2016).
- 592 36. Winsor, G. L. *et al.* The Burkholderia Genome Database: Facilitating flexible  
593 queries and comparative analyses. *Bioinformatics* **24**, 2803–2804 (2008).
- 594 37. Compant, S., Nowak, J., Coenye, T., Clément, C. & Ait Barka, E. Diversity and  
595 occurrence of Burkholderia spp. in the natural environment. *FEMS*  
596 *Microbiology Reviews* **32**, 607–626 (2008).
- 597 38. Eberl, L. & Vandamme, P. Members of the genus Burkholderia: good and bad  
598 guys. *F1000Research* **5**, 1007 (2016).
- 599 39. Flórez, L. V. *et al.* An antifungal polyketide associated with horizontally  
600 acquired genes supports symbiont-mediated defense in *Lagria villosa* beetles.  
601 *Nat. Commun.* **9**, 2478 (2018).
- 602 40. Swain, D. M. *et al.* A prophage tail-like protein is deployed by Burkholderia  
603 bacteria to feed on fungi. *Nat. Commun.* **8**, 404 (2017).
- 604 41. Gerdes, K. & Maisonneuve, E. Bacterial Persistence and Toxin-Antitoxin Loci.  
605 *Annu. Rev. Microbiol.* **66**, 103–123 (2012).
- 606 42. Van Acker, H., Sass, A., Dhondt, I., Nelis, H. J. & Coenye, T. Involvement of  
607 toxin-antitoxin modules in Burkholderia cenocepacia biofilm persistence.  
608 *Pathog. Dis.* **71**, 326–335 (2014).
- 609 43. Jha, G., Tyagi, I., Kumar, R. & Ghosh, S. Draft Genome Sequence of Broad-  
610 Spectrum Antifungal Bacterium Burkholderia gladioli Strain NGJ1, Isolated  
611 from Healthy Rice Seeds. *Genome Announc.* **3**, e00803-15 (2015).
- 612 44. Martínez-García, P. M., Ramos, C. & Rodríguez-Palenzuela, P. T346Hunter: A  
613 novel web-based tool for the prediction of type III, type IV and type VI secretion  
614 systems in bacterial genomes. *PLoS One* **10**, e0119317 (2015).
- 615 45. Marchler-Bauer, A. *et al.* CDD : NCBI ' s conserved domain database. *Nucleic*  
616 *Acids Res.* **43**, 222–226 (2015).
- 617 46. Finn, R. D. *et al.* Pfam: The protein families database. *Nucleic Acids Research*  
618 **42**, D222-D230 (2014).

- 619 47. Waterhouse, A. *et al.* SWISS-MODEL: Homology modelling of protein  
620 structures and complexes. *Nucleic Acids Res.* **46**, W296–W303 (2018).
- 621 48. Giesecke, A. V. & Joung, J. K. The Bacterial Two-Hybrid System as a Reporter  
622 System for Analyzing Protein-Protein Interactions. *Cold Spring Harb. Protoc.*  
623 **2007**, pdb-prot4672 (2007).
- 624 49. Blazquez, M. Quantitative GUS Activity Assay in Intact Plant Tissue. *Cold*  
625 *Spring Harb. Protoc.* **2007**, pdb-prot4688 (2007).
- 626 50. NCBI Resource Coordinators, N. R. Database resources of the National  
627 Center for Biotechnology Information. *Nucleic Acids Res.* **44**, D7-19 (2016).
- 628 51. Kumar, S., Stecher, G., Li, M., Knyaz, C. & Tamura, K. MEGA X: Molecular  
629 evolutionary genetics analysis across computing platforms. *Mol. Biol. Evol.* **35**,  
630 1547–1549 (2018).
- 631

632 **Acknowledgements** SKY and JD acknowledge fellowship from DBT, Govt. of India.  
633 SG and RK acknowledge SPM and SRA fellowship from CSIR, Govt of India,  
634 respectively. We sincerely thank RV Sonti (NIPGR) for providing *E. coli* strains,  
635 Manjula Reddy (CSIR-CCMB) for sharing different strains/plasmids for bacterial two  
636 hybrid assay and Pinky Agarwal (NIPGR) for providing strains for yeast transcription  
637 repression assay. We also acknowledge Prabhu Patil and Kanika Bansal (IMTECH,  
638 Chandigarh) for valuable discussion and suggestions on genome analysis.

639 We sincerely thank RV Sonti, and SK Ray for valuable comments on the manuscript.  
640 This work was supported by core research grant from National Institute of Plant  
641 Genome Research, India. Also research funding from DBT, Government of India  
642 which support GJ lab is gratefully acknowledged. The funders had no role in study  
643 design, data collection and analysis, decision to publish, or preparation of the  
644 manuscript.

645 **Author contributions** GJ has overall planned the study and has supervised the  
646 experiments. SKY has initiated the project and handled most of the experiments  
647 presented in this study. AM and AK had assisted in characterization of T6SS  
648 effectors and their antibacterial property. SG carried out phylogenetic analysis and  
649 assisted in computational analysis. RK and JD had assisted in molecular cloning.  
650 SKY, AM, SG, and GJ contributed in manuscript writing and all authors had  
651 approved the manuscript.

## 652 **Competing interests**

653 The authors declare no competing financial interests.

654 **Figures**

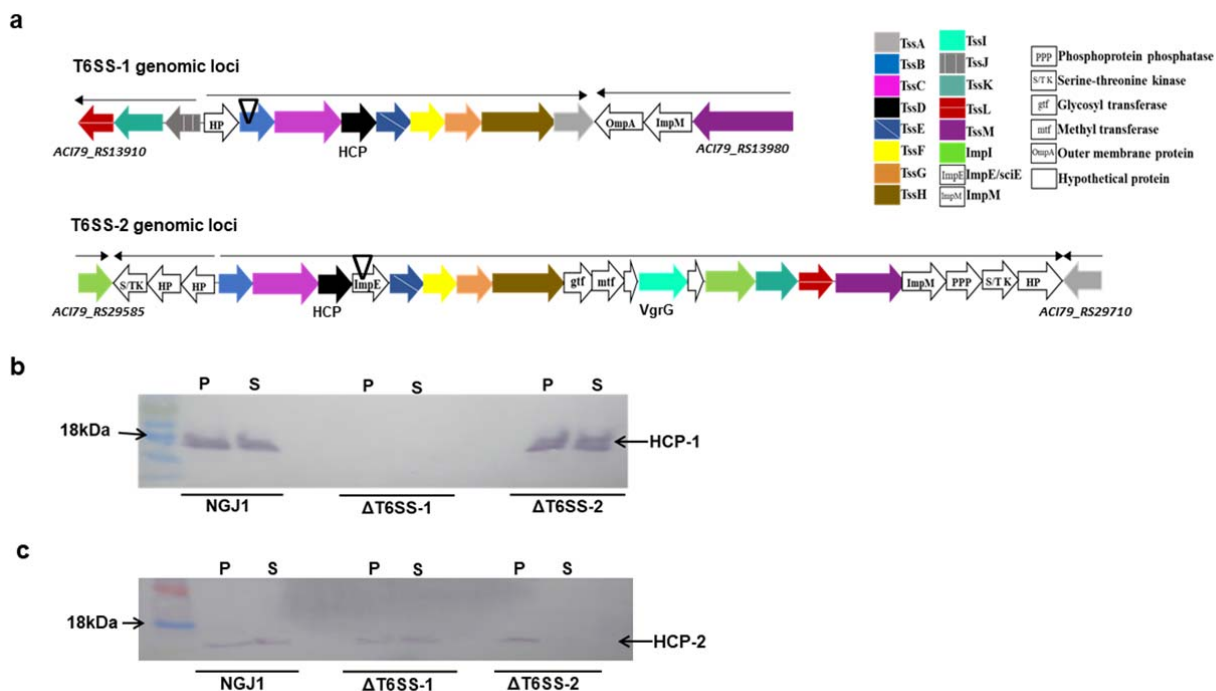

Fig. 1

655

656 **Fig. 1 *B. gladioli* strain NGJ1 encodes two different T6SS apparatus** (a)

657 Schematic representation of genomic organization of two different T6SS apparatus

658 encoding operons (named as T6SS-1 and T6SS-2) in NGJ1 genome. Common

659 components of the apparatus are color coded while unique components are

660 indicated by their particular names in empty boxes. (b) Secretion profile of HCP

661 protein in different NGJ1 strains. The total proteins from cell-free supernatant (S) as

662 well as whole-cell lysates (P) of different strains were immunoblotted using HCP-1

663 (associated with T6SS-1) and HCP-2 (associated with T6SS-2) specific antibodies.

664 Both the HCP proteins were detected in the supernatant of NGJ1 culture, while only

665 HCP-2 was detected in  $\Delta$ T6SS-1 and HCP-1 in  $\Delta$ T6SS-2, culture supernatants.

666 Similar results were obtained in at least two independent experiments.

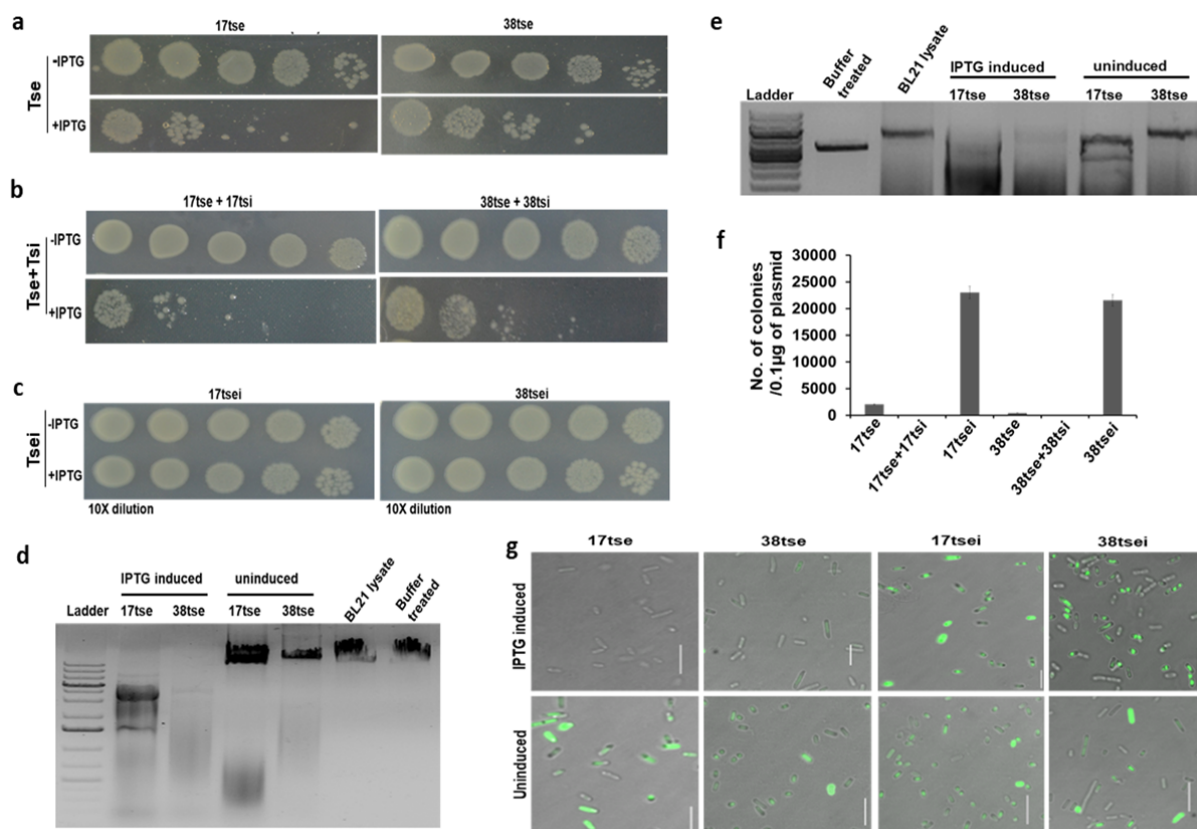

Fig. 2

667

668 **Fig. 2 The Tse effectors of NGJ1 exhibit anti-bacterial activity.** (a) IPTG induced  
669 expression of Tse protein inhibited the growth of recombinant *E. coli* (BL21) cells. (b)  
670 Co-expression of the immunity protein (Tsi) and the cognate Tse effector protein  
671 using two different plasmids (referred as Tse + Tsi) could not protect the cells from  
672 effector mediated killing. (c) Coupled-expression of transcriptionally fused Tse and  
673 Tsi proteins using a single plasmid (Tsei) protected the cells. (d) Treatment with  
674 crude preparation of Tse proteins caused the degradation of lambda DNA and (e)  
675 bacterial plasmid (*EcoRI* digested pET23b). (f) Graph showing number of *E. coli*  
676 (DH5α) cells obtained upon transformation of plasmids that were isolated from  
677 various Tse/ Tse+Tsi/ Tsei protein expressing *E. coli* (BL21) cells. Graph shows  
678 mean values  $\pm$  s.d. (g) Fluorescence microscopic images of SYTOX-green (nucleic  
679 acid staining dye) stained *E. coli* (BL21) cells that express Tse/ Tsei proteins. Lack of  
680 staining in the effector expressing cells suggested DNA degradation while proper  
681 staining in the transcriptionally fused effector-immunity (Tsei) expressing cells  
682 suggested intact DNA (scale bar = 10µm). Similar results were obtained in at least  
683 three independent experiments.

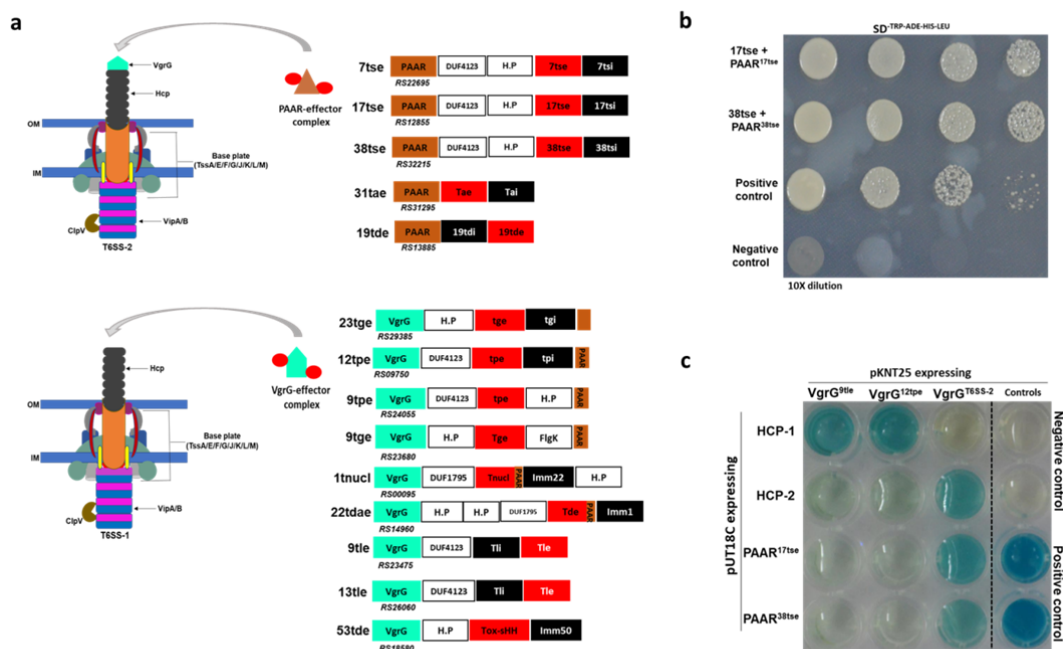

684

Fig. 3

685 **Fig. 3 The Tse effectors are potentially secreted by T6SS-2 of NGJ1.** (a)

686 Schematic representation of potential mode of secretion of various T6SS effectors.

687 The PAAR containing effectors are anticipated to be delivered by T6SS-2 while the

688 VgrG containing effectors are thought to be delivered by T6SS-1. (b) Yeast two

689 hybrid assay demonstrating positive interaction of Tse (17tse and 38tse) effector with

690 the corresponding PAAR protein (PAAR<sup>Tse</sup>) encoded in their operon. Interaction

691 between p53 and SV40 large T-antigen (T) proteins were used as positive control.

692 The pGBKT7 and pGADT7 (empty vectors) were used as negative control. (c)

693 Bacterial two hybrid assay demonstrating interaction between various components of

694 T6SS apparatus and effector operons. Interaction between T25-Zip and T18-Zip was

695 used as positive control while pKNT25 and pUT18C (empty vectors) were used as

696 negative control. Appearance of blue color suggested positive interaction while

697 absence of color suggested no interaction. Interaction of PAAR<sup>Tse</sup> with the VgrG<sup>T6SS-2</sup>

698 and HCP-2 with VgrG<sup>T6SS-2</sup> suggested the delivery of Tse effectors through T6SS-2.

699 Similar results were obtained in at least three independent experiments.

700



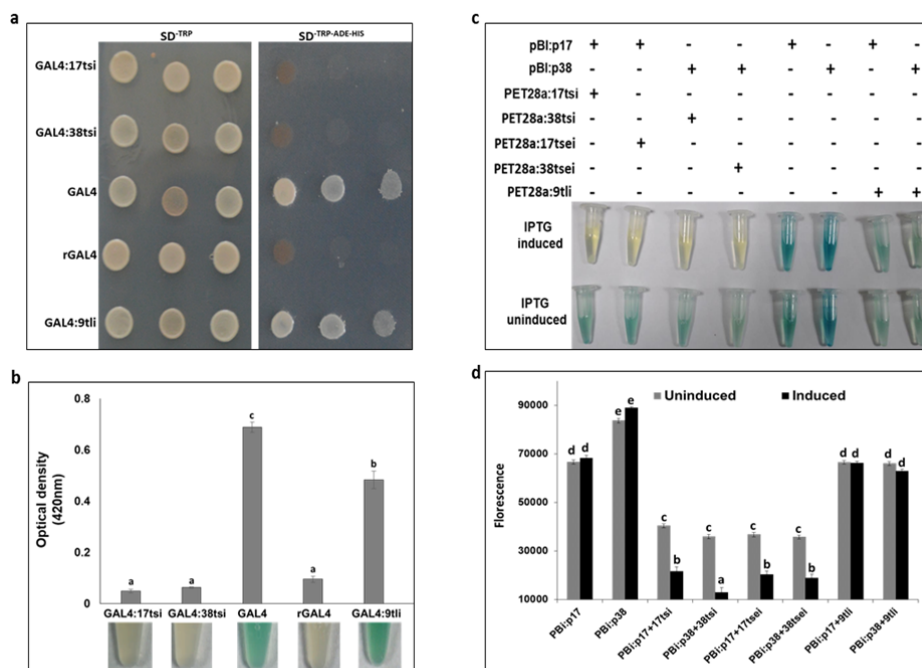

Fig. 4

701

702 **Fig. 4 The Tsi immunity proteins of NGJ1 demonstrate transcriptional**  
 703 **repressor activity.** (a) Trans-repression assay in *S. cerevisiae* (yeast) wherein cells  
 704 expressing GAL4 fused with Tsi immunity proteins (GAL4:17tsi/GAL4:38tsi) were  
 705 unable to express reporter gene. The recombinant cells showed auxotrophy to ADE  
 706 (adenine) and HIS (histidine). On the other hand, cells expressing native GAL4 or  
 707 GAL4 fused with 9tli immunity protein (GAL4:9tli) were able to drive the expression  
 708 of reporter genes. The rGAL4 (lacking activation domain) was used as negative  
 709 control. (b) Expression of  $\beta$ -galactosidase reporter gene in recombinant yeast cells  
 710 as revealed by X-gal (5-bromo-4-chloro-3-indolyl- $\beta$ -D-galactopyranoside) coloration  
 711 and calorimetric estimation. (c) The Tsi immunity proteins can repress their own  
 712 promoter. The promoter of 17tse and 38tse encoding operon could drive the  
 713 expression of reporter gene (*GUS*;  $\beta$ -glucuronidase) in *E. coli* as revealed by  
 714 appearance of blue color. However, the *GUS* expression was repressed in presence  
 715 of immunity (17tsi/ 38tsi) or effector-immunity (17tsei/ 38tsei) proteins. In presence of  
 716 9tli immunity protein, the *GUS* expression was observed. (d) Fluorometric  
 717 quantification of GUS protein by MUG (4-methylumbelliferyl  $\beta$ -D-glucuronide) assay.  
 718 Values with different letters are significantly different at  $P < 0.001$  (estimated using  
 719 one-way ANOVA). Graphs show mean values  $\pm$  standard deviation. Similar results  
 720 were obtained in at least three independent experiments.





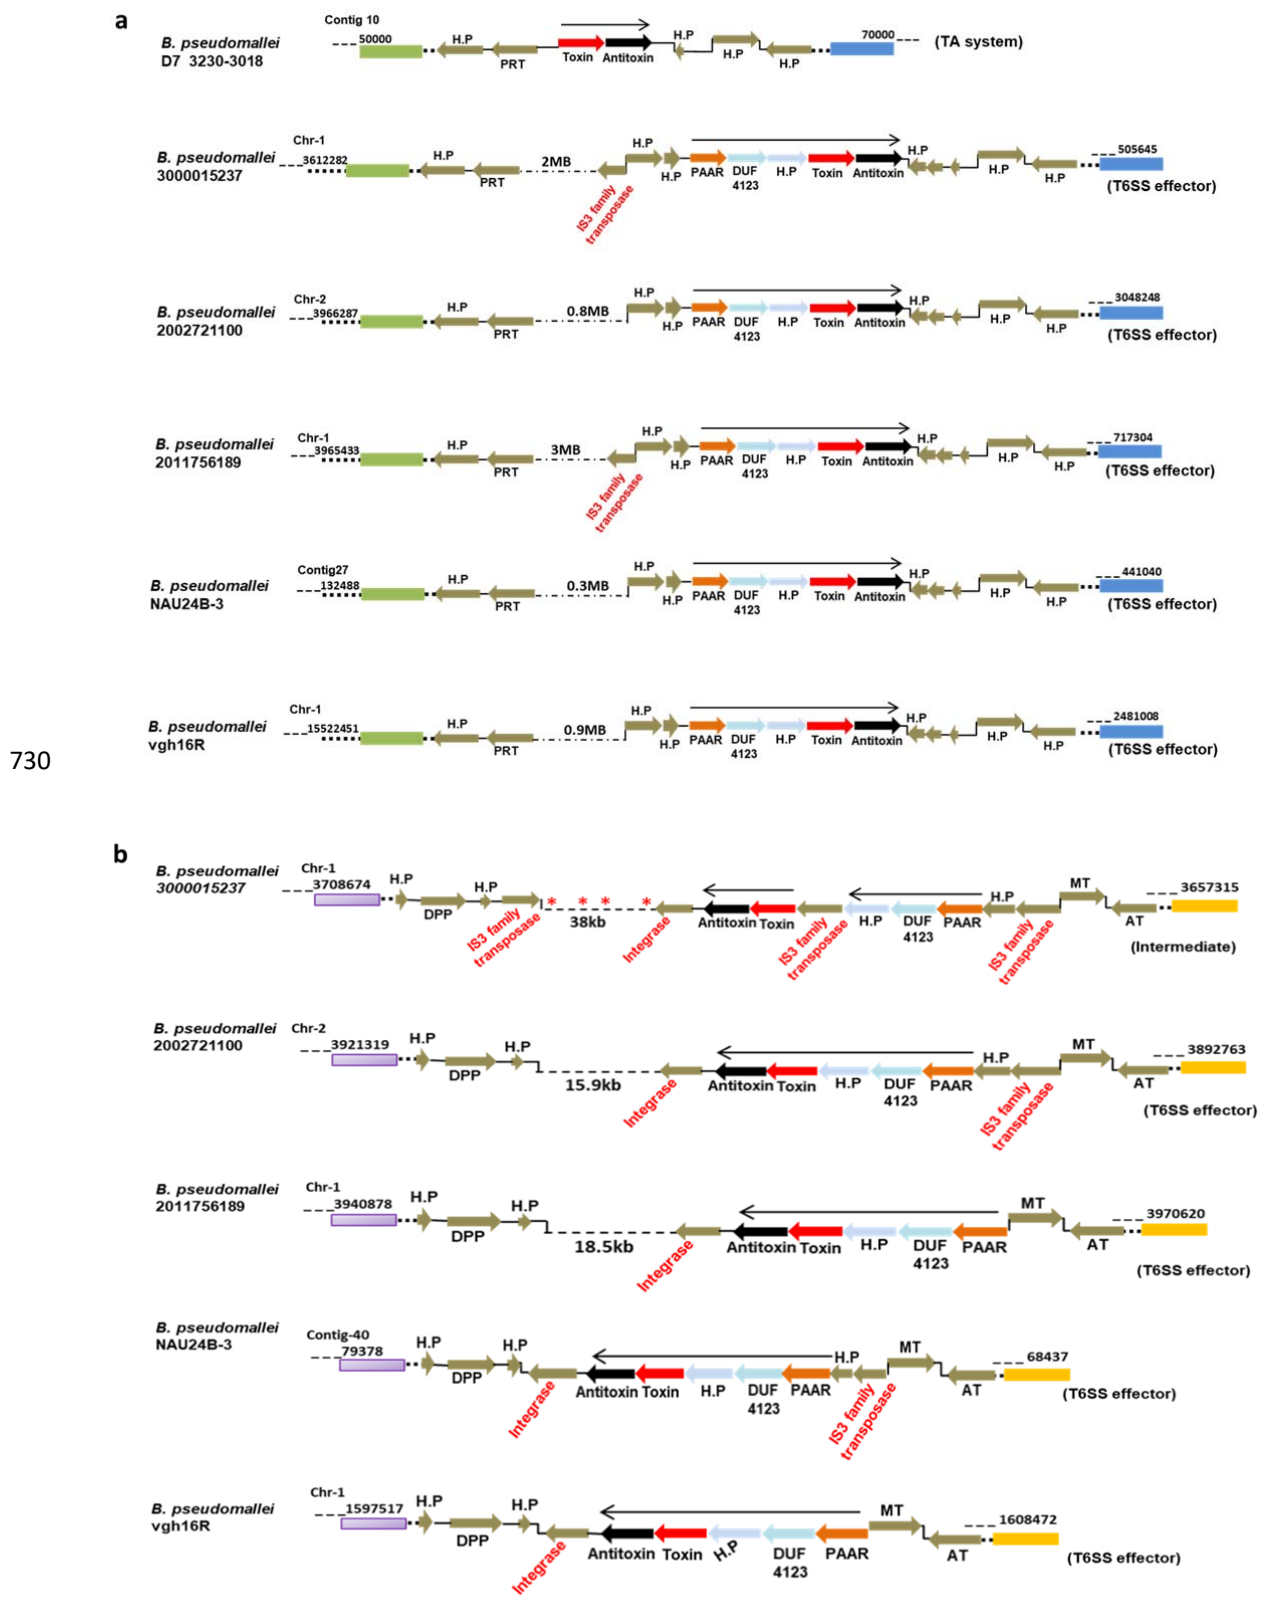

Fig. 6

732 **Fig. 6 Conversion of Tse orthologs of a TA system into T6SS effectors in *B.***  
733 ***pseudomallei*.** (a) The genomic loci containing Tse orthologs (analogous to toxins)  
734 and cognate immunity protein (analogous to antitoxins) in different *B. pseudomallei*  
735 strains. The toxin and antitoxins were either encoded together (considered as TA) or  
736 encoded along with certain T6SS related (PAAR, DUF4123 and hypothetical protein)  
737 genes (considered as T6SS effector). The conservation of flanking genes reflects  
738 potential evolution occurring at the same genomic loci. (b) Intermediary stages of  
739 conversion of Tse orthologs into T6SS effectors in different *B. pseudomallei* strains.  
740 The sequential insertion and excision of IS3 transposable elements had potentially  
741 created operonic fusion of TA genes with the T6SS related genes, converting them  
742 into T6SS effector. Asterisks indicates presence of IS3 family transposase.
